# Supplementary material for: A Critical Bottleneck in Energy Transition: Quantitative Predictions and Potential Strategies for Lithium Resource Depletion
Source: Research Square preprint supplement (doi:10.21203/rs.3.rs-6962776/v1), 2025-06-30
Supplement: Supplementary file 1 [file eb445adf38b1ac5fe097afce.docx]

Supplemental information

**A Critical Bottleneck in Energy Transition: Quantitative Predictions and Potential Strategies for** **Lithium Resource Depletion**

Zewei Zou1, Zhexi Xiao*5, Zhenkang Lin4,1, Bingchen Zhang1, Guo Tian1, Chenxi Zhang*2,1,3, Fei Wei*1,2,3

1*Beijing Key Laboratory of Green Chemical Reaction Engineering and Technology, Department of Chemical Engineering, Tsinghua University, 100084 Beijing, China*

2*Ordos Laboratory, Ordos, 017010 Inner Mongolia, China*

3*Institute for Carbon Neutrality, Tsinghua University, Beijing, 100084 China*

4*Beijing Key Laboratory for Chemical Power Source and Green Catalysis, School of Chemistry and Chemical Engineering, Beijing Institute of Technology, Beijing, 100081, China*

*5School of Chemistry, South China Normal University, Guangzhou 510006, China*

First author:

Zewei Zou E-mail: ZeweiZouedu@outlook.com

*Corresponding author:

Prof. Fei Wei E-mail: [wf-dce@tsinghua.edu.cn](mailto:wf-dce@tsinghua.edu.cn);

Prof. Chenxi Zhang E-mail: cxzhang@mail.tsinghua.edu.cn

Prof. Zhexi Xiao E-mail: xiaozx@scnu.edu.cn;

**Table S1. Reserves and production of lithium over the years.**

| year | Reserves (kt) | Production (kt) | R/P |
| --- | --- | --- | --- |
| 2017 | 16000 | 44.7 | 358 |
| 2018 | 13919 | 61.8 | 225.4 |
| 2019 | 15485 | 77 | 201 |
| 2020 | 18955 | 86.3 | 219.6 |
| 2021 | 20255 | 106 | 191.1 |
| 2022 | 23024 | 130.4 | 176.6 |
| 2023 | 26028 | 198 | 131.45 |

The data reserves and production of per year are obtained as following:

2017: https://www.bp.com/content/dam/bp/business-sites/en/global/corporate/pdfs/energy-economics/statistical-review/bp-stats-review-2018-full-report.pdf

2018: https://www.bp.com/content/dam/bp/business-sites/en/global/corporate/pdfs/energy-economics/statistical-review/bp-stats-review-2019-full-report.pdf

2019: https://www.bp.com/content/dam/bp/business-sites/en/global/corporate/pdfs/energy-economics/statistical-review/bp-stats-review-2020-full-report.pdf

2020: https://www.bp.com/content/dam/bp/business-sites/en/global/corporate/pdfs/energy-economics/statistical-review/bp-stats-review-2021-full-report.pdf

2021: https://www.bp.com/content/dam/bp/business-sites/en/global/corporate/pdfs/energy-economics/statistical-review/bp-stats-review-2022-full-report.pdf

2022:https://www.energyinst.org/__data/assets/pdf_file/0004/1055542/EI_Stat_Review_PDF_single_3.pdf

2023: <https://www.energyinst.org/statistical-review>

**Fig.S1** (a) Lithium reserves and (b) production over the past 10 years by nations.

**Fig.S2** (a) Lithium reserves and (b) production over the past 20 years by nations.

**Fig.S3** (a) Lithium reserves and (b) production over the past 30 years by nations.

**Table S2. Lithium reserves over the years by nations. (Unit: kilotons)**

|  | United States | Argentina | Australia | Brazil | Chile | China | Portugal | Zimbabwe |
| --- | --- | --- | --- | --- | --- | --- | --- | --- |
| 1996 | 340 | NA | 370 | 0.91 | 1300 | NA | NA | 23 |
| 1997 | 340 | NA | 150 | 0.91 | 1300 | NA | NA | 23 |
| 1998 | 340 | NA | 150 | 0.91 | 3000 | NA | NA | 23 |
| 1999 | 38 | NA | 150 | 0.91 | 3000 | NA | NA | 23 |
| 2000 | 38 | NA | 150 | 0.91 | 3000 | NA | NA | 23 |
| 2001 | 38 | NA | 150 | 0.91 | 3000 | NA | NA | 23 |
| 2002 | 38 | NA | 150 | 0.91 | 3000 | NA | NA | 23 |
| 2003 | 38 | NA | 160 | 190 | 3000 | 540 | NA | 23 |
| 2004 | 38 | NA | 160 | 190 | 3000 | 540 | NA | 23 |
| 2005 | 38 | NA | 160 | 190 | 3000 | 540 | NA | 23 |
| 2006 | 38 | NA | 160 | 190 | 3000 | 540 | NA | 23 |
| 2007 | 38 | NA | 160 | 190 | 3000 | 540 | NA | 23 |
| 2008 | 38 | NA | 160 | 190 | 3000 | 540 | NA | 23 |
| 2009 | 38 | NA | 170 | 190 | 3000 | 540 | NA | 23 |
| 2010 | 38 | 800 | 580 | 190 | 7500 | 540 | NA | 23 |
| 2011 | 38 | 850 | 580 | 64 | 7500 | 3500 | 10 | 23 |
| 2012 | 38 | 850 | 970 | 64 | 7500 | 3500 | 10 | 23 |
| 2013 | 38 | 850 | 1000 | 46 | 7500 | 3500 | 10 | 23 |
| 2014 | 38 | 850 | 1000 | 46 | 7500 | 3500 | 60 | 23 |
| 2015 | 38 | 850 | 1500 | 48 | 7500 | 3500 | 60 | 23 |
| 2016 | 38 | 2000 | 1500 | 48 | 7500 | 3200 | 60 | 23 |
| 2017 | 38 | 2000 | 1600 | 48 | 7500 | 3200 | 60 | 23 |
| 2018 | 35 | 2000 | 2700 | 48 | 7500 | 3200 | 60 | 23 |
| 2019 | 35 | 2000 | 2700 | 54 | 8000 | 1000 | 60 | 70 |
| 2020 | 630 | 1700 | 2800 | 95 | 8600 | 1000 | 60 | 230 |
| 2021 | 750 | 1900 | 4700 | 95 | 9200 | 1500 | 60 | 220 |
| 2022 | 750 | 2200 | 5700 | 95 | 9200 | 1500 | 60 | 220 |
| 2023 | 1000 | 2700 | 6200 | 250 | 9300 | 2000 | 60 | 310 |
| 2024 | 1100 | 3600 | 6200 | 390 | 9300 | 3000 | 60 | 310 |

**Table S3. Lithium production over the years by nations. (Unit: kilotons)**

|  | Argentina | Australia | Brazil | Chile | China | Portugal | Zimbabwe |
| --- | --- | --- | --- | --- | --- | --- | --- |
| 1994 | 0.008 | 1.7 | 0.032 | 2 | 0.32 | 1.8 | 0.38 |
| 1995 | 0.008 | 1.7 | 0.032 | 2 | 0.32 | 0.16 | 0.52 |
| 1996 | 0.008 | 3.7 | 0.032 | 2.7 | 2.8 | 0.16 | 0.5 |
| 1997 | 0.008 | 2.8 | 0.032 | 4.1 | 2.9 | 0.18 | 0.7 |
| 1998 | 1.13 | 2.1 | 0.032 | 4.7 | 3 | 0.16 | 1 |
| 1999 | 0.2 | 2.2 | 0.032 | 5.3 | 2.3 | 0.14 | 0.7 |
| 2000 | 0.2 | 2.4 | 0.03 | 5.3 | 2.4 | 0.14 | 0.74 |
| 2001 | 0.2 | 2 | 0.22 | 6.8 | 2.4 | 0.2 | 0.7 |
| 2002 | 0.946 | 3.14 | 0.224 | 5.92 | 2.4 | 0.19 | 0.64 |
| 2003 | 0.96 | 3.45 | 0.24 | 6.58 | 2.5 | 0.19 | 0.48 |
| 2004 | 1.97 | 3.93 | 0.242 | 7.99 | 2.63 | 0.32 | 0.24 |
| 2005 | 1.98 | 3.77 | 0.242 | 8.27 | 2.82 | 0.32 | 0.26 |
| 2006 | 2.9 | 5.5 | 0.242 | 8.2 | 2.82 | 0.32 | 0.6 |
| 2007 | 3 | 6.91 | 0.18 | 11.1 | 3.01 | 0.57 | 0.3 |
| 2008 | 3.17 | 6.28 | 0.16 | 10.6 | 3.29 | 0.7 | 0.5 |
| 2009 | 2.22 | 6.28 | 0.16 | 5.62 | 3.76 | 0 | 0.4 |
| 2010 | 2.95 | 9.26 | 0.16 | 10.51 | 3.95 | 0.8 | 0.47 |
| 2011 | 2.95 | 12.5 | 0.32 | 12.9 | 4.14 | 0.82 | 0.47 |
| 2012 | 2.7 | 12.8 | 0.15 | 13.2 | 4.5 | 0.56 | 1.06 |
| 2013 | 2.5 | 12.7 | 0.4 | 11.2 | 4.7 | 0.57 | 1 |
| 2014 | 3.2 | 13.3 | 0.16 | 11.5 | 2.3 | 0.3 | 0.9 |
| 2015 | 3.6 | 14.1 | 0.2 | 10.5 | 2 | 0.2 | 0.9 |
| 2016 | 5.8 | 14 | 0.2 | 14.3 | 2.3 | 0.4 | 1 |
| 2017 | 5.7 | 40 | 0.2 | 14.2 | 6.8 | 0.8 | 0.8 |
| 2018 | 6.4 | 58.8 | 0.3 | 17 | 7.1 | 0.8 | 1.6 |
| 2019 | 6.3 | 45 | 2.4 | 19.3 | 10.8 | 0.9 | 1.2 |
| 2020 | 5.9 | 39.7 | 1.42 | 21.5 | 13.3 | 0.348 | 0.417 |
| 2021 | 5.97 | 55.3 | 1.7 | 28.3 | 14 | 0.9 | 0.71 |
| 2022 | 6.59 | 74.7 | 2.63 | 38 | 22.6 | 0.38 | 1.03 |
| 2023 | 8.63 | 91.7 | 5.26 | 41.4 | 35.7 | 0.38 | 14.9 |

The data are obtained as following:

[**Lithium Statistics and Information | U.S. Geological Survey**](https://www.usgs.gov/centers/national-minerals-information-center/lithium-statistics-and-information)

This table presents the evolving patterns of lithium reserves and production outputs among principal lithium-producing nations from 1995 to 2024. Under the United States Geological Survey's (USGS) statistical framework, lithium production data for certain nations remain undisclosed in specific years. Notably, the United States has systematically withheld annual lithium production statistics throughout this period, a practice implemented to protect the confidentiality of the companies involved in resource exploitation. This methodological approach aligns with USGS protocols governing sensitive commercial information in mineral commodity reporting.

**Table S4. Global EV sales over the years.**

| Year | vehicles |
| --- | --- |
| 2016 | 79.1 |
| 2017 | 126.2 |
| 2018 | 208.2 |
| 2019 | 227.6 |
| 2020 | 324.5 |
| 2021 | 677.4 |
| 2022 | 1052.4 |
| 2023 | 1418.2 |

The data are obtained as following:

https://ev-volumes.com/news/ev/global-ev-sales-for-2023/

**Table S5. The world car ownership data per 1,000 people.**

| Countries | Vehicles/per 1000 people |
| --- | --- |
| United States | 863 |
| Canada | 665 |
| Iceland | 863 |
| the United Kingdom | 583 |
| France | 653 |
| Germany | 684 |
| Finland | 949 |
| Norway | 758 |
| Sweden | 615 |
| Australia | 753 |

The average of top ten developed countries are obtained as following:

<https://ourworldindata.org/grapher/registered-vehicles-per-1000-people>

**Table S6. Global installed capacity over the years.**

| Year | Global installed capacity (GWh) |
| --- | --- |
| 2016 | 123.8 |
| 2017 | 143.5 |
| 2018 | 196.3 |
| 2019 | 238.6 |
| 2020 | 294.4 |
| 2021 | 562.4 |
| 2022 | 957.7 |
| 2023 | 1202.6 |

The data are obtained from following:

<http://www.evtank.cn/DownloadDetail.aspx?ID=547>

**Lithium consumption in commercial LIBs**

Design of high-power 45Ah battery

Currently, in terms of power batteries, lithium-ion batteries (LIBs) play dominate role, in which liquid electrolytes are typically used. Among the different components in batteries, the cathodes are the main source of lithium, whether the lithium cobalt oxide (LiCoO2), or the commonly used ternary (LiNixCoyMn1-x-yO2) or lithium iron phosphate (LiFePO4), their molecules contain 1mol of lithium. The proportion of cathode in the entire cell is also the largest, which occupies the main source of lithium in the battery. In addition, in order to promise the transportation of lithium ions, the electrolyte must also contain lithium ions, but it should be noted that the current commercial liquid electrolytes are the dilute solution. Usually 1~1.2mol/L of lithium salt is dissolved in a mixture of ethylene carbonate (EC) and other linear/cyclic organocabonates (in this concentration range lithium ion conductivity is the highest),1, 2 its main component is the solvent rather than the solute. In addition, the other main components do not have lithium, including commonly used graphite or silicon-based anodes, separators, conductive agents, and copper/aluminum foil as current collector. Therefore, for LIBs, only the lithium in cathodes and electrolytes are needed to be considered.

As for the design of a 45Ah high-power aluminum shell cell, in terms of ternary-based batteries, when the battery is charged to 4.35V, the capacity of cathode is 165mAh/g, and the need amount of lithium is estimated to be 45×1000/165/96.55=2.82mol to achieve the design capacity of 45Ah. And the amount of the LiPF6 electrolyte is about 0.113mol, which only accounts for about 4% of the amount in cathode.

Calculation of electrolyte lithium content can be based on the amount of liquid retention (the industry commonly used this parameter, which can be reduced by increasing the compaction density and reducing the porosity) to estimate. Generally, high-power ternary-based cells can achieve the liquid retention coefficient of 3g/Ah, therefore 45Ah cell liquid injection amount is about 135g. Based on the 1.2g/cm3 of electrolyte density and the concentration of 1mol/L, the lithium content in the electrolyte is 0.113mol. If the lithium content per unit Wh is calculated according to 4% of the cathode in the electrolyte, the total energy of the cell is 3.73V×45Ah=167.85Wh, the total lithium content is 2.82×1.04=2.93mol×6.94g/mol=20.33g, and the lithium content per unit Wh is 20.33/167.85=0.121g/Wh. According to the 50kWh of electricity for passenger car, the lithium required by the individual is estimated to be 6.05kg.

For the LFP-based battery, the calculation method is similar, but the specific capacity of LFP is lower than ternary-based cathodes, the highest capacity is about 150mAh/g. For a 45Ah cell, the mole numbers of the cathode is 45×1000/150/157.76=1.9mol, corresponding to 1.9 mol of lithium. However, the amount of liquid retention will increase, assuming that it is calculated according to 3.5g/Ah (generally between 3.2~3.6g/Ah), the lithium content of the electrolyte is 45×3.5/1.2*1mol/L=0.13mol, accounting for about 6.8% of the amount in LFP. It can be seen that the electrolyte consumed by LFP is more than that of ternary-based batteries. The total energy of the LFP cell estimated to be 45×3.2=144Wh, if calculated according to the 7% of lithium content in the electrolyte, the total lithium content is 1.9×1.07=2.033mol=14.11g, lithium content per unit Wh is 14.11/3.2/45=0.098g/Wh. According to the 50kWh of electricity for passenger car, the lithium required by the individual is estimated to be 4.9kg.

From the above calculation results, it can be seen that the amount of LFP per unit Wh is better than ternary-based cathodes, which can be mainly attributed to a higher utilization efficiency of lithium in cathodes.

**Cathode utilization efficiency calculation**

Here, the cathode utilization efficiency (CUE) is defined as the ratio of the lithium capacity used for the electrochemical reaction (real discharge capacity, ) to the theoretical capacity of the cathode ().3, 4

(1)

The theoretical capacity of LFP is about 170 mAh/g,5, 6 and the delivery capacity can reach nearly 150 mAh/g,7-9 which estimated to be 85~90% of CUE. In contrast, the theoretical capacity of the ternary-based material is about 275 mAh/g,10 and the delivery capacity can only reach 165~170 mAh/g for the NCM523,11-13 which estimated to be about 60% of the CUE. It can be seen that nearly 40% of the lithium in the NCM523 is not fully utilized, which is a great disadvantage compared with LFP. In case of the higher nickel content in 8/9 series NCM (nickel content >80%), the delivery capacity can reach 215~230 mAh/g,14-17 corresponding a higher CUE of ~80%. For the utilization of solid-state electrolytes (SSEs), due to the high interfacial resistance and poor contact, when paring with LiCoO2 (LCO) in oxide-based SSEs, such as garnet-type SSEs, only 80~90 mAh/g capacity can be delivered, corresponding to an inferior CUE of ~30%.18-20 In the case of sulfide-based SSEs, the CUE of LCO is still not high enough, only 120~130 mAh/g capacity can be delivered, corresponding to a CUE of ~47%.21-23 The case in polymer-based SSEs is pretty similar, 140~130 mAh/g capacity corresponding to a CUE of ~50%.24-26

In terms of the anodes, silicon-based anodes have been considered as a promising candidate to replace the low-capacity of graphite anodes. Compared to the pure Si, silicon monoxide-based anodes has intrinsic advantages due to a better trade-off capacity and cyclability, the carbon coating further increases the integral conductivity to promote the electrochemical performance, which have been gradually applied in the commercial LIBs.27, 28 However, the low initial coulombic efficiency (ICE) due to the inactive components (Li*y*SiO*x* and Li2O) during the first lithiation process hinders the practical application.29 The prelithiated SiO-C anode has been achieved a higher ICE from pristine 75-77% to 86%.30 Compared to the conventional graphite anodes, the Si-based anodes will lead to the lower discharge platform of the full cell, reduce the capacity delivery of cathode. At the end of the discharge, a smoother in discharge curve for Si-based anodes suggests more unreleased capacity is observed for the Si-based anodes in the low voltage range than that of the graphite anodes. The mismatch of CE between anode and cathode leads to a poor CUE in full cell, which is identified as a main reason of fast capacity decay.31 For example, the case in LFP-based batteries reveals that a 130~140 mAh/g of first discharge capacity can be achieved with prelithiated SiOx anode, corresponding to a CUE of nearly 79%.32, 33 And the similar first discharge capacity of ~135 mAh/g is achieved with porous micro-sized Si anode prepared by SiH4 chemical vapor decomposition, showing no obvious improvement in CUE.34, 35 When paring with NCM622 in full cell, a first discharge capacity of 173 mAh g-1 with an ICE of 87.3% is achieved, corresponding to a CUE of 63%.36

Therefore, based on the above results, from the perspective of the match between anode and cathode, the combination of LFP and graphite has advantages for the achieving a high CUE, although the theoretical capacity for integral batteries is low. For the application of various high-energy density electrode systems, such as ternary cathodes and silicon-based carbon anodes, etc., the CUE will be reduced to different degrees. The solid-state electrolytes have a lower CUE due to poor interface contact and high resistance.

**References:**

1. H. Jia, Z. Yang, Y. Xu, P. Gao, L. Zhong, D. J. Kautz, D. Wu, B. Fliegler, M. H. Engelhard, B. E. Matthews, B. Broekhuis, X. Cao, J. Fan, C. Wang, F. Lin and W. Xu, *Adv. Energy Mater.*, 2023, **13**, 2203144.

2. H. Jia and W. Xu, *Trends Chem.*, 2022, **4**, 627-642.

3. X. Guo, L. Hao, Y. Yang, Y. Wang, Y. Lu and H. Yu, *J. Mater. Chem. A*, 2019, **7**, 25915-25924.

4. Y. J. Kim, T. D. Hoang, S. C. Han, J. A. Bang, H. W. Kang, J. Kim, H. Park, J.-H. Park, J.-W. Park, G. Park, Y.-J. Lee, D. Kim, S.-W. Eom, J.-H. Choi, S.-K. Lee, J. Moon, Y.-C. Ha and B. G. Kim, *Energy Storage Mater.*, 2024, **71**, 103607.

5. Z. Cui, X. Guo, J. Ren, H. Xue, F. Tang, P. La, H. Li, J. Li and X. Lu, *Electrochim. Acta*, 2021, **388**, 138592.

6. T. Dai, X. Kouoi, M. Reynaud, M. Wagemaker, M. Valldor, T. Famprikis and A. Y. Koposov, *Energy Storage Mater.*, 2024, **68**, 103363.

7. K. J. H. i. S. Fu, *Eng. Technol*., 2023, **37**, 45-54.

8. Y.-R. Chen, L.-Y. Chen, C.-Y. Chung, Y.-H. Su, F.-Y. Wu, T.-M. Hsu, P.-W. Chi, P. M. Wu, K.-S. Chang-Liao, H.-Y. Tang and M.-K. Wu, *J. Power Sources*, 2024, **613**, 234861.

9. H. Pan, L. Wang, Y. Shi, C. Sheng, S. Yang, P. He and H. Zhou, *Nat. Commun.*, 2024, **15**, 2263.

10. L. An, R. Zhang, P. N. Didwal, M. W. Fraser, L. A. H. Jones, C. M. E. Phelan, N. Ramesh, G. Harris, R. S. Weatherup, J. E. N. Swallow, P. Cong, A. Poletayev, E. Björklund, C. Sahle, P. Ferrer, D. C. Grinter, P. Bencok, S. Hayama, S. Islam, R. House, P. D. Nellist, R. J. Green and R. J. Nicholls, *Energy Environ. Sci.*, 2024, **17**, 8379-8391..

11. B. Raj, M. K. Sahoo, A. Nikoloski, P. Singh, S. Basu and M. Mohapatra, *Batteries Supercaps*, 2023, **6**, e202200418.

12. X. Liu, Y. Xie, Y. Du, F. Hu, L. Chen, F. Wu, D. Feng, Y. Meng, Y. Mei and D. Xie, *Chem. Eng. Sci.*, 2024, **293**, 119965.

13. S. Klein, J. M. Wrogemann, S. van Wickeren, P. Harte, P. Bärmann, B. Heidrich, J. Hesper, K. Borzutzki, S. Nowak, M. Börner, M. Winter, J. Kasnatscheew and T. Placke, *Adv. Energy Mater.*, 2022, **12**, 2102599.

14. H. Huang, L. Qiao, H. Zhou, Y. Tang, M. J. Wahila, H. Liu, P. Liu, G. Zhou, M. Smeu and H. Liu, *Sci. Rep.*, 2024, **14**, 18180.

15. Y. Li, Z. Tan, Y. Liu, C. Lei, P. He, J. Li, Z. He, Y. Cheng, F. Wu and Y. Li, *Nano Energy*, 2024, **119**, 109070.

16. S. Wang, X. Zhou, T. Zhao, J. Peng, Z. Bin, W. Xing, M. Zuo, P. Zhang, W. Fan, G. Lv, W. Hua and W. Xiang, *Nano Energy*, 2024, **129**, 110008.

17. G.-T. Park, S.-B. Kim, J.-I. Yoon, N.-Y. Park, M.-C. Kim, S.-M. Han, D.-H. Kim, M.-S. Kim and Y.-K. Sun, *Adv. Energy Mater.*, 2024, **14**, 2400130.

18. T. Kato, T. Hamanaka, K. Yamamoto, T. Hirayama, F. Sagane, M. Motoyama and Y. Iriyama, *J. Power Sources*, 2014, **260**, 292-298.

19. S. Ohta, S. Komagata, J. Seki, T. Saeki, S. Morishita and T. Asaoka, *J. Power Sources*, 2013, **238**, 53-56.

20. C.-W. Wang, S.-J. Zhang, C. Lin, S. Xue, Y.-P. Deng, B. Zhang, L. Yang, X. Yao, L. Zeng, J.-T. Li, F. Pan and Z.-W. Yin, *Nano Energy*, 2023, **108**, 108192.

21. F. Zhao, S. Zhang, S. Wang, C. M. Andrei, H. Yuan, J. Zhou, J. Wang, Z. Zhuo, Y. Zhong, H. Su, J. T. Kim, R. Yu, Y. Gao, J. Guo, T.-K. Sham, Y. Mo and X. Sun, *Energy Environ. Sci.*, 2024, **17**, 4055-4063.

22. Z. Su, G. Li and J. Zhang, *Adv. Funct. Mater.*, 2025, **35**, 2415409.

23. W. He, N. Ahmad, S. Sun, X. Zhang, L. Ran, R. Shao, X. Wang and W. Yang, *Adv. Energy Mater.*, 2023, **13**, 2203703.

24. Y. Chen, C. Ling, K. Long, X. Liu, P. Xiao, Y.-Z. Yu, W. Wei, X. Ji, W. Tang, G.-C. Kuang and L. Chen, *Chem. Eng. J.*, 2024, **488**, 150888.

25. W. U. Arifeen, Z. U. Abideen, N. Guru Parakash, L. Xiaolong and T. J. Ko, *Mater. Today Energy*, 2023, **33**, 101270.

26. C. Fu, X. Zhang, H. Huo, J. Zhu, H. Xu, L. Wang, Y. Ma, Y. Gao, G. Yin, P. Zuo and J. Lu, *Adv. Funct. Mater.*, 2024, **34**, 2312187.

27. M. Je, D.-Y. Han, J. Ryu and S. Park, *Acc. Chem. Res.*, 2023, **56**, 2213-2224.

28. J. Wu, Q. Dong, Q. Zhang, Y. Xu, X. Zeng, Y. Yuan and J. Lu, *Adv. Mater.*, 2024, **36**, 2405751.

29. R. Wang, H. Li, Y. Wu, H. Li, B. Zhong, Y. Sun, Z. Wu and X. Guo, *Adv. Energy Mater.*, 2022, **12**, 2202342.

30. F. Jiang, Y. Sun, K. Zhang, Y. Liu, X. Feng and H. Xiang, *Electrochim. Acta*, 2021, **398**, 139315.

31. K. Kierzek and J. Machnikowski, *Electrochim. Acta*, 2016, **192**, 475-481.

32. S. Bai, W. Bao, K. Qian, B. Han, W. Li, B. Sayahpour, B. Sreenarayanan, D. H. S. Tan, S.-y. Ham and Y. S. Meng, *Adv. Energy Mater.*, 2023, **13**, 2301041.

33. B. Huang, T. Huang, L. Wan and A. Yu, *ACS Sustainable Chem. Eng.*, 2021, **9**, 648-657.

34. P. Xu, D. Guo, X. Lin, X. Wang, Z. Zhang, C. Zeng, M. Liao, Z. Su, Q. Huang and M. Zhang, *J. Energy Storage*, 2024, **98**, 113225.

35. S. Liu, B. Liu, Z. Yu, Z. Sun, M. Liu, X. Luo, M.-S. Wang, Y. Gao and B. Wang, *ACS Nano*, 2024, **18**, 17326-17338.

36. Q. Meng, G. Li, J. Yue, Q. Xu, Y.-X. Yin and Y.-G. Guo, *ACS Appl. Mater. Interfaces*, 2019, **11**, 32062-32068.
